# Supplementary material for: Differences in salicylic acid glucose conjugations by UGT74F1 and UGT74F2 from Arabidopsis thaliana
Source: PubMed Central journal article supplement (PMC5397973; doi:10.1038/srep46629), 2017-04-20
Supplement: srep46629-s1.pdf [file srep46629-s1.pdf]

# Supplementary Information

## Differences in salicylic acid glucose conjugations by UGT74F1 and UGT74F2 from *Arabidopsis thaliana*

Alayna M. George Thompson<sup>1</sup>, Cristina V. Iancu<sup>1</sup>, Kenneth E. Neet<sup>1</sup>, John V. Dean<sup>2</sup>, Jun-yong Choe<sup>1</sup>

<sup>1</sup> Department of Biochemistry and Molecular Biology, Rosalind Franklin University of Medicine and Science, The Chicago Medical School, 3333 Green Bay Road, North Chicago, IL 60064, USA

<sup>2</sup> Department of Biological Sciences, DePaul University, 2325 N. Clifton Ave. Chicago, IL 60614, USA

**Supplementary Table S1.** Comparison of UGT74F2 UDP/SA complex structure to previously crystallized UGTs. Structures were aligned to UGT74F2 by overlaying the nucleotide binding domain (residues 332-362 in UGT74F2) with the program Superpose<sup>42</sup>, and then all-atom RMSD were calculated.

| Enzyme   | Known <i>in vitro</i> major products                                                                                         | Ref.   | Id.(%) to UGT74F1 | Id. (%) to UGT74F2 | PDB ID | Co-crystallized with       | RMSD (Å) |
|----------|------------------------------------------------------------------------------------------------------------------------------|--------|-------------------|--------------------|--------|----------------------------|----------|
| UGT71 G1 | Flavonoid O-glucoside [quercetin glucosides (3O' major product), geinistein-7-O-glucoside] Saponins (triterpene O-glucoside) | 30     | 25.2              | 25.7%              | 2ACV   | UDP                        | 7.39     |
| UGT72 B1 | Monolignol O-glucoside Chloroaniline N-glucoside                                                                             | 31, 32 | 28.3              | 30.5%              | 2VG8   | UDP, Tris                  | 10.48    |
|          |                                                                                                                              |        |                   |                    | 2VCE   | U2F, 2,4,5-trichlorophenol | 10.39    |
|          |                                                                                                                              |        |                   |                    | 2VCH   | UDP                        | 10.37    |
| UGT78 G1 | Anthocyanidin 3-O-glucoside Flavonoid 3-O-glucoside                                                                          | 33     | 25.5              | 26.2               | 3HBJ   | UDP                        | 4.84     |
|          |                                                                                                                              |        |                   |                    | 3HBF   | UDP + myricetin            | 4.89     |
| UGT78 K6 | Anthocyanidin 3-O-glucoside Flavonoid 3-O-glucoside                                                                          | 28     | 27.9              | 27.0               | 4REL   | Kaempferol                 | 5.09     |
|          |                                                                                                                              |        |                   |                    | 4WHM   | UDP                        | 5.05     |
| UGT85 H2 | Kaempferol 3-O-glucoside Biochanin A 7-O-glucoside                                                                           | 33, 34 | 30.8              | 30.4               | 2PQ6   |                            | 6.86     |
| GT1      | Flavonoid 3-O-glucoside                                                                                                      | 26     | 27.1              | 26.6               | 2c1x   | UDP                        | 5.92     |
|          |                                                                                                                              |        |                   |                    | 2c1z   | U2F, kaempferol            | 5.93     |
|          |                                                                                                                              |        |                   |                    | 2c9z   | UDP, quercetin             | 6.11     |

Abbreviations: Ref., reference; Id., protein sequence identity

**Supplementary Table S2.** Average thermal factors (B parameters) of the carboxyl group in salicylic acid or in 2-bromobenzoic acid relative to those of side chain atoms for residues 15 ( $C_{\beta}$ ) and 365 ( $C_{\beta}$ ,  $C_{\gamma}$  and  $O_{\gamma}$ ). SA has two conformations: SA and SA<sup>alternate</sup> (see Supplementary Fig. 4). Protein crystal structures used were: SA/UDP complexes for UGT74F2<sub>wt</sub> and UGT74F2<sub>T15S</sub> (PDB ID 5U6M, 5U6N), 2-BA/UDP complexes for UGT74F2<sub>wt</sub>, UGT74F2<sub>T15S</sub> and UGT74F2<sub>T15A</sub> (PDB ID 5U6S, 5V2J, 5V2K). Ratio is [Average B for Ligand (A)] / [Average B for Residues 15 and 365 (B)]; a lower ratio indicates a higher occupancy for the ligand.

| Protein complex                                    | Average B for Ligand (A) | Average B for Residues 15 and 365 (B) | Ratio (=A/B) |
|----------------------------------------------------|--------------------------|---------------------------------------|--------------|
| SA in UGT74F2 <sub>wt</sub>                        | 100                      | 68                                    | 1.5          |
| SA in UGT74F2 <sub>T15S</sub>                      | 95                       | 50                                    | 1.9          |
| SA <sup>alternate</sup> in UGT74F2 <sub>wt</sub>   | 134                      | 70                                    | 1.9          |
| SA <sup>alternate</sup> in UGT74F2 <sub>T15S</sub> | 119                      | 51                                    | 2.3          |
| 2-BA in UGT74F2 <sub>wt</sub>                      | 106                      | 31                                    | 3.4          |
| 2-BA in UGT74F2 <sub>T15S</sub>                    | 55                       | 29                                    | 1.9          |
| 2-BA in UGT74F2 <sub>T15A</sub>                    | 58                       | 33                                    | 1.8          |

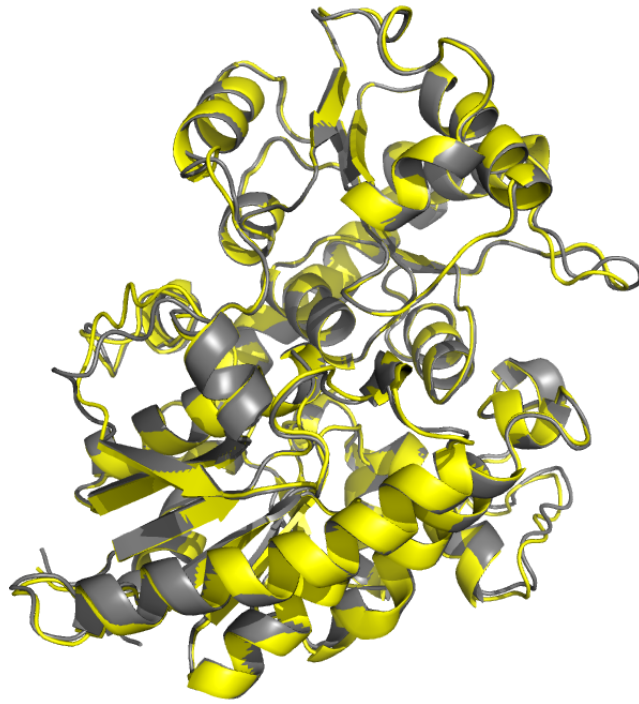

**Supplementary Figure S1.** A (gray) and B (yellow) chains of UGT74F2 in complex with UDP and SA.

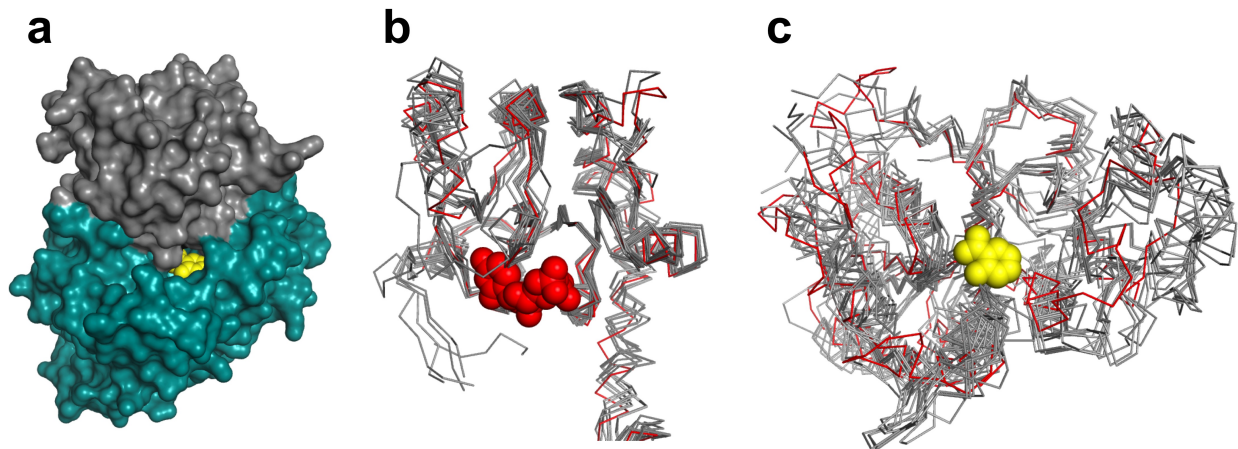

**Supplementary Figure S2.** Crystal structure of UGT74F2 in complex with UDP and SA - comparison to homologs. **(a)** Surface view of the crystal structure; SA bound to UGT74F2 is visible through an aqueous cavity. **(b)** UDP (red balls) and C-terminal UGT74F2 (red trace) compared to superposed homologs (grey traces). **(c)** SA (yellow balls) and N-terminal UGT74F2 (red trace) compared to superposed homologs (grey traces).

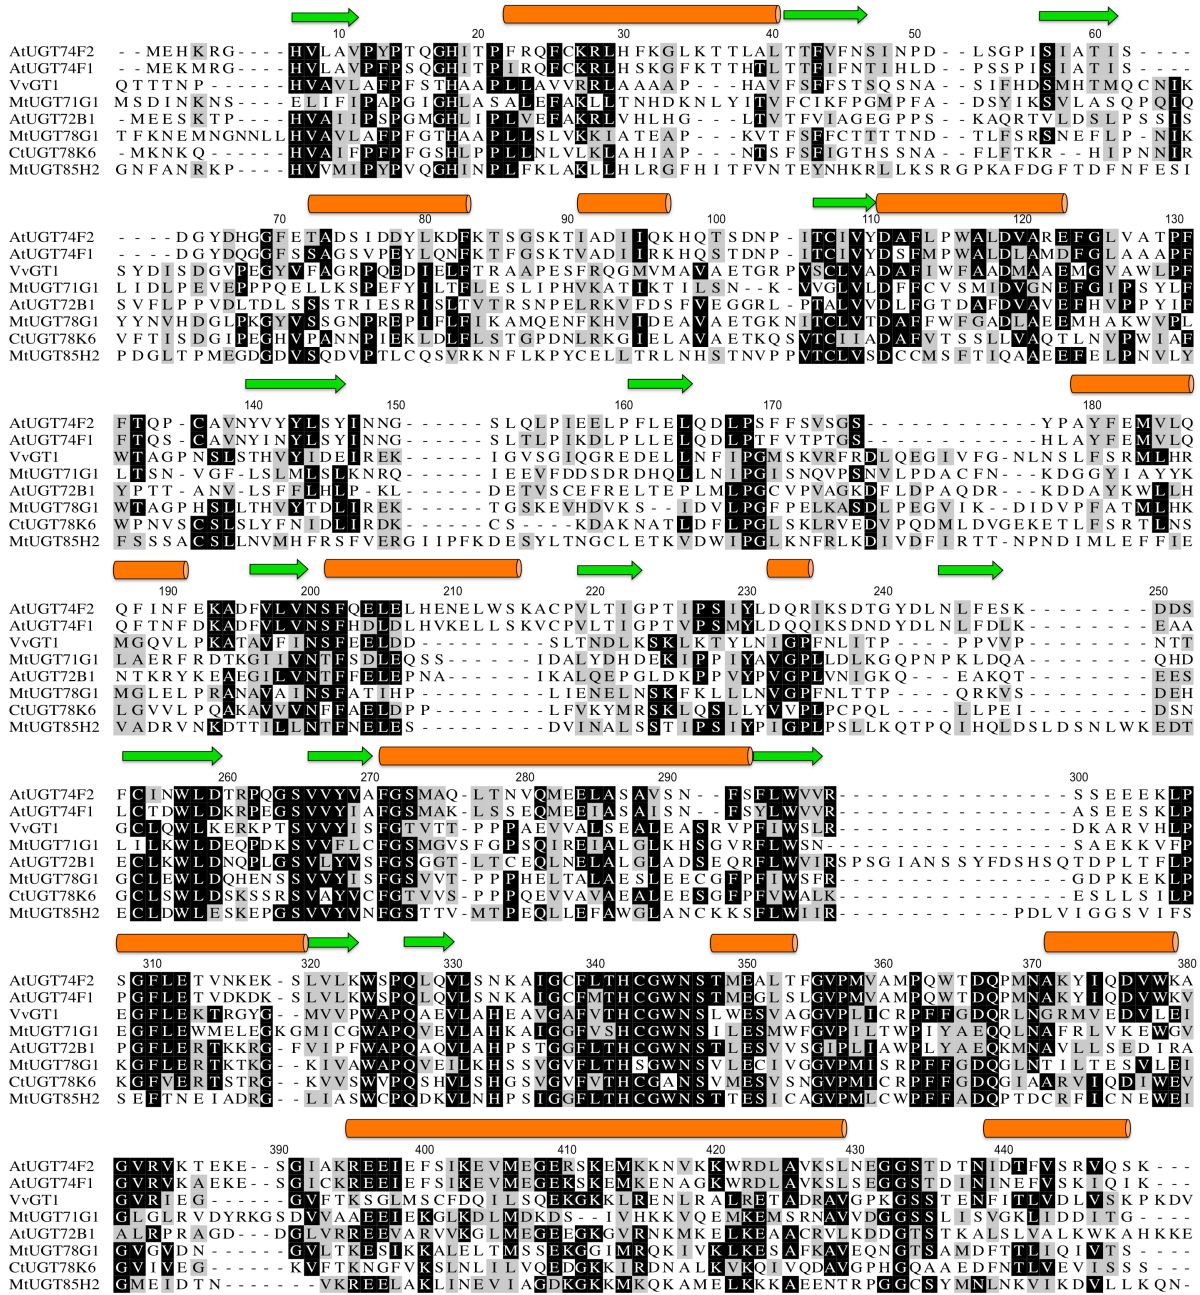

Supplementary Figure S3. Sequence alignment of UGT74F2 and UGTs with known crystal structures.



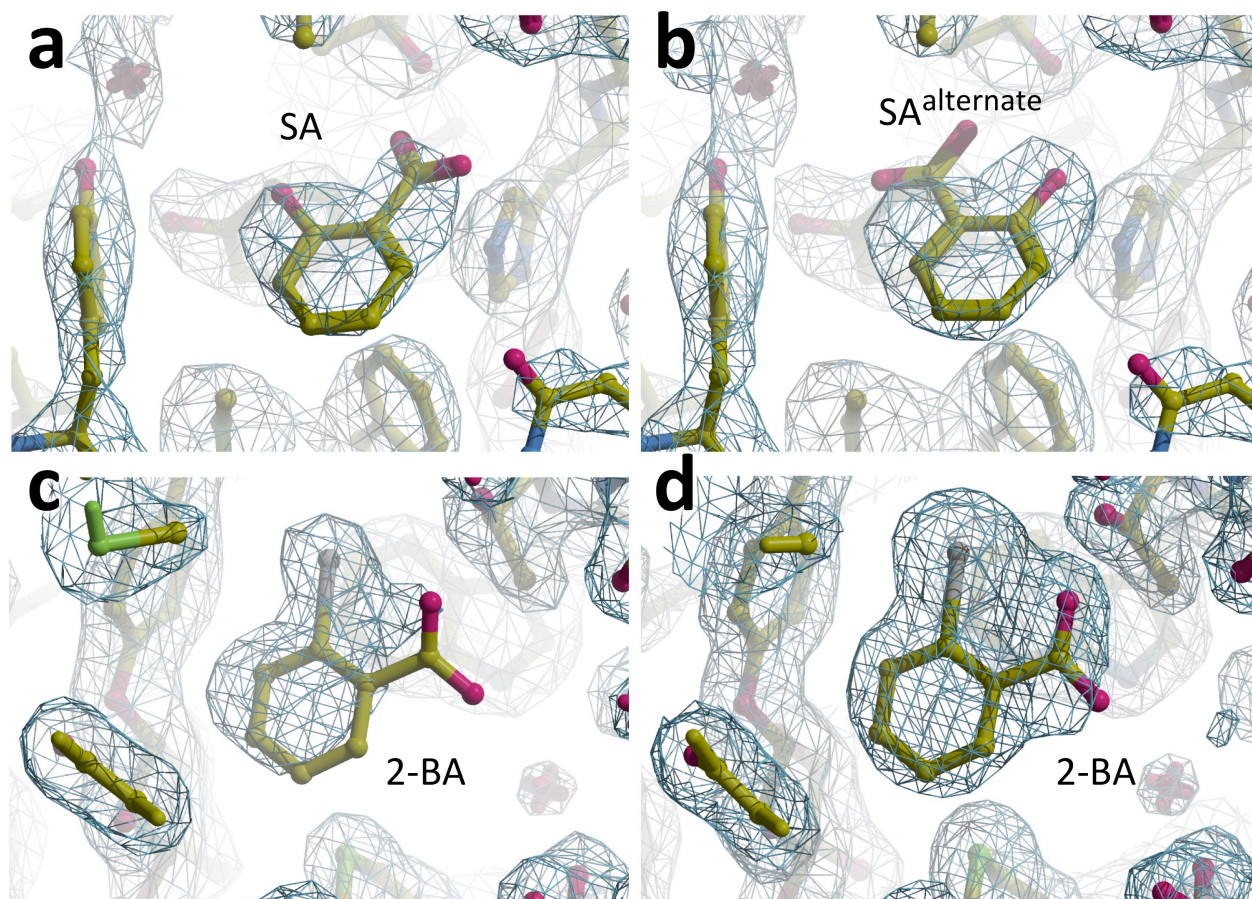

**Supplementary Figure S4.** Salicylic acid and 2-bromobenzoate in 2Fo-Fc electron density map (1.2 rmsd contour level). Two different conformations of salicylate in electron density map of UGT74F2 SA/UDP complex: the canonical conformation (SA in PDB ID 5U6M; **a**) and an alternate conformation (SA<sup>alternate</sup>, **b**). Average thermal parameters analysis of these conformations (Supplementary Table 2) support SA conformation shown in (**a**) for the UGT74F2 SA/UDP complex. 2-bromobenzoate in wild-type (**c**) and T15S (**d**) mutant 2-BA/UDP complexes (PDB IDs 5U6S and 5V2J). Average thermal parameters analysis (Supplementary Table 2) shows that 2-BA has higher occupancy in the mutant relative to the wild-type.

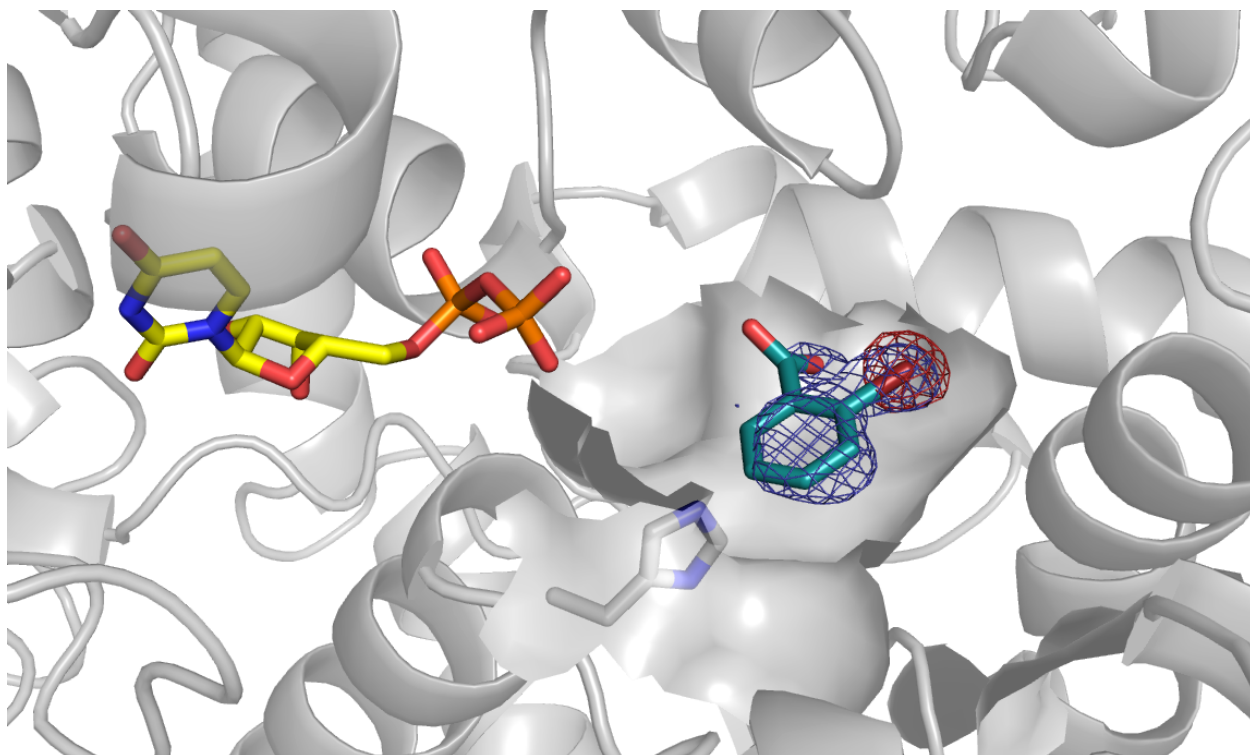

**Supplementary Figure S5.** 2-bromobenzoic acid (2-BA) in UGT74F2 acceptor binding site shown in omit map ( $1\sigma$ , blue mesh); the anomalous difference density map ( $4\sigma$ , red mesh) indicates the position of Br in 2-BA.



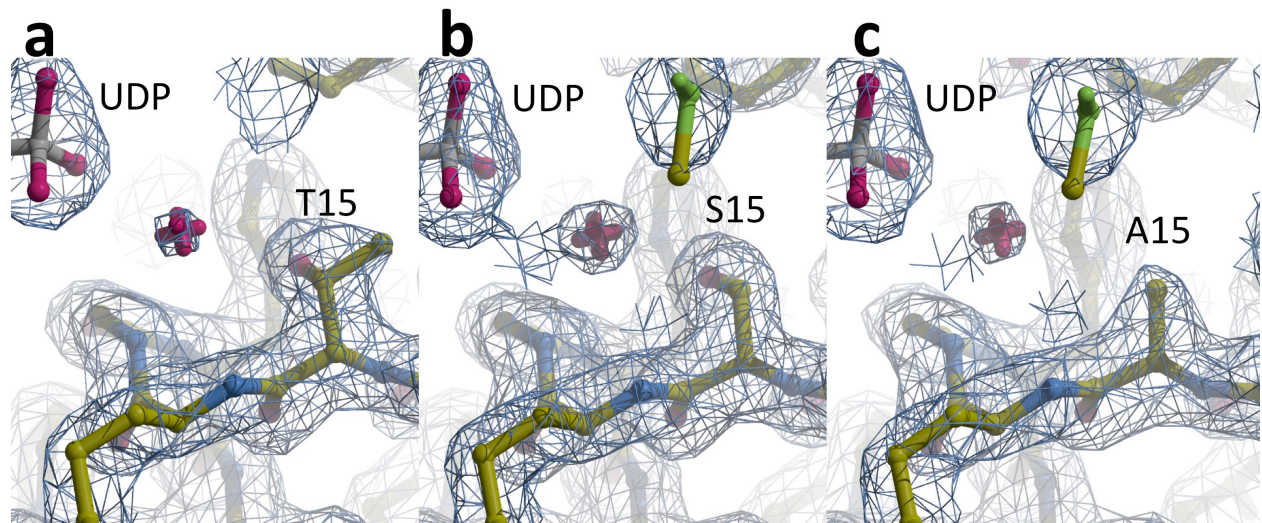

**Supplementary Figure S6.** 2Fo-Fc electron density map (1.5 rmsd contour level) of UGT74F2 amino acid residue 15 in wild type (**a**), T15S (**b**), and T15A (**c**) UDP/2-BA complex structures.

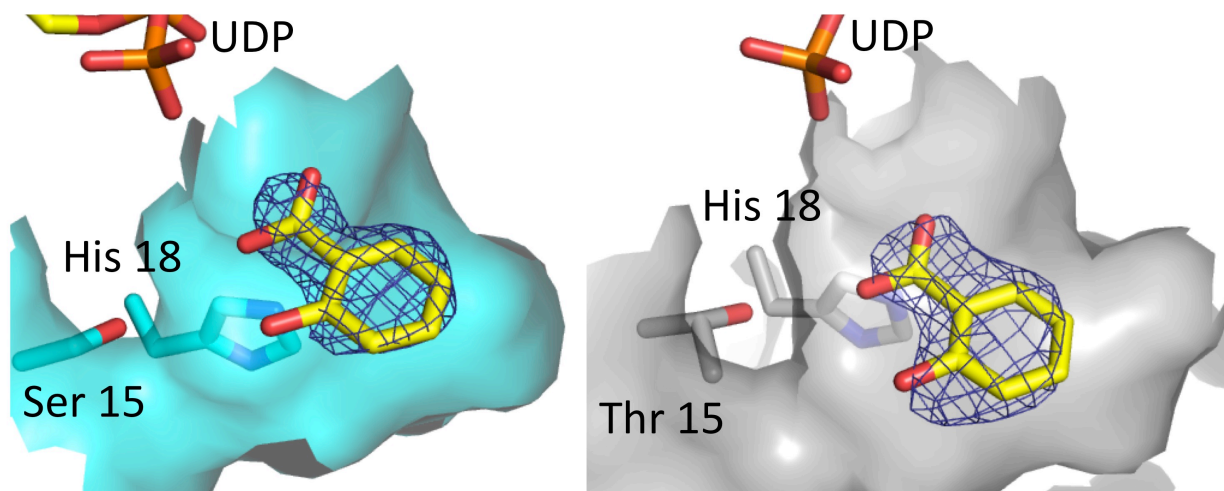

**Supplementary Figure S7.** Salicylic acid in UGT74F2 wild-type (right) or T15S mutant (left). Omit electron density map (contoured at  $1\sigma$  level) is shown in blue mesh. Average thermal parameters analysis suggests that occupancy of SA in the shown conformation (i.e. canonical SA from the SA/UDP complex of UGT74F2wt) is higher in wild-type than in the mutant.
